1 **Corona virus fear among health workers during the early phase of pandemic**  
2 **response in Nepal: a web-based cross-sectional study**

3 **Short title: Corona virus fear among health workers in Nepal**

4 **Authors and affiliation**

5 **Pratik Khanal<sup>1</sup>, Navin Devkota<sup>2</sup>, Minakshi Dahal<sup>3</sup>, Kiran Paudel<sup>1</sup> Shiva Raj Mishra<sup>4</sup>,**  
6 **Devavrat Joshi<sup>2</sup>**

7 <sup>1</sup>Institute of Medicine, Tribhuvan University, Kathmandu, Nepal

8 <sup>2</sup>National Academy for Medical Sciences, Kathmandu, Nepal

9 <sup>3</sup>Center for Research on Environment, Health and Population Activities (CREHPA), Kathmandu,  
10 Nepal

11 <sup>4</sup>Nepal Development Society, Chitwan, Nepal

12 **Email address of authors**

13 [pratikkhanal@iom.edu.np](mailto:pratikkhanal@iom.edu.np) (PK); [devkotanavin@gmail.com](mailto:devkotanavin@gmail.com) (ND); [minakshidahal@gmail.com](mailto:minakshidahal@gmail.com)  
14 (MD); [kiranpaudel7@iom.edu.np](mailto:kiranpaudel7@iom.edu.np) (KP); [shivarajmishra@gmail.com](mailto:shivarajmishra@gmail.com) (SRM);  
15 [devrat\\_joshi@yahoo.com](mailto:devrat_joshi@yahoo.com) (DJ)

16 Corresponding author: Pratik Khanal, Institute of Medicine, 44600, Kathmandu, Nepal Email:  
17 [pratikkhanal@iom.edu.np](mailto:pratikkhanal@iom.edu.np)

18 **Abstract**

19 **Background:** Health workers involved in COVID-19 response might be at risk of developing  
20 fear and psychological distress. This study aimed to identify factors associated with COVID-19  
21 fear among health workers in Nepal during the early phase of pandemic.

22 **Methods:** A web-based cross-sectional survey was conducted in the month of April-May 2020  
23 among 475 health workers directly involved in COVID-19 management. The Fear Scale of  
24 COVID 19 (FCV-19S) was used to measure the status of fear. Scatter plots were used to observe  
25 the relationship between fear and other psychological outcomes: anxiety, depression and  
26 insomnia. Multivariable logistic regression was done to identify factors associated with COVID  
27 fear.

28 **Results:** COVID-19 fear score was moderately correlated with anxiety and depression, and  
29 weakly correlated with insomnia ( $p < 0.001$ ). Nurses (AOR=2.29; 95% CI: 1.23-4.26), health  
30 workers experiencing stigma (AOR=1.83; 95% CI: 1.12-2.73), those working in affected  
31 district(AOR=1.76; 95% CI: 1.12-2.77) and presence of family member with chronic diseases  
32 (AOR=1.50; 95% CI: 1.01-2.25) was associated with higher odds of developing COVID-19 fear  
33 as compared to other health workers, health workers not experiencing stigma, working in non-  
34 affected district and not having family member with chronic diseases respectively .

35 **Conclusion:** Nurses, health workers facing stigma, those working in affect district and having  
36 family member with chronic diseases were more at risk of developing COVID-19 fear. It is thus  
37 recommended to improve work environment to reduce fear among health workers, employ  
38 stigma reduction interventions, and ensure personal and family support for those having family  
39 member with chronic diseases.

40 **Key words:** COVID-19, fear, health workers, mental health, Nepal

## 41 **Introduction**

42 The psychological implications as a result of disease outbreak is often neglected by the health  
43 system[1-3] although studies have found that the proportion of mental health effects is higher  
44 than the effect of particular disease during the epidemics[4]. COVID-19 is burdening the health  
45 systems including health workforce and paralyzing economies across the world. Nepal, a South  
46 Asian country, ranking low in health security index (111 out of 195 countries[5] is not an  
47 exception from the threat of COVID-19. The country reported its first case on January 23[6] and  
48 the total infection toll has reached to 168.235 along with 920 deaths as of October 30, 2020[7].  
49 The increasing rate of the infection is putting a strain on its already compromised health system  
50 [8]. Health care workers who are at the frontline of managing of COVID 19 are prone to  
51 developing psychological outcome as they work in a stressful situation[9]. Early evidence has  
52 shown increased work pressure, inadequate protective measures, risk of infection, and  
53 transmitting infection to family members, limited organizational support and exhaustion  
54 contributing to adverse mental outcomes including fear in health workers [3,10-12].

55 Fear and stress experienced by health workers affect their work, behaviour and health outcomes  
56 [13,14]. The understanding of fear and other psychological outcomes among health workers has  
57 not much received attention during the pandemic. There are limited published studies which  
58 have investigated the mental health impact of COVID-19 among health workers in Nepal  
59 [15,16]. In this regard, this study aims to assess the status of COVID-19 fear among health  
60 workers involved in COVID-19 response in a low resource setting. In addition, it aims to explore  
61 the relationship of COVID-19 fear with other mental health outcomes among health workers.

## 62 **Materials and Methods**

## 63 **Study design, participants and procedures**

64 A total of 475 health workers participated in the study. A web-based cross-sectional survey was  
65 conducted among health workers directly involved in COVID-19 management in between April  
66 26 to May 12 in 2020. Social media groups of professional organizations were identified and  
67 health workers were requested for their interest to participate in the study. Those health workers  
68 who expressed interest were personally invited to fill up the Google forms. The inclusion criteria  
69 for the study were those aged 18 years and above, currently working in Nepal, and involved in  
70 COVID-19 response. The study protocol was approved by Ethical Review Board of Nepal  
71 Health Research Council (Registration number: 2192; 315/2020).

## 72 **Measures**

73 The fear scale of COVID 19 (FCV-19S) was used in the study for assessing the fear among  
74 health workers. It is a relatively new scale developed by Ahorsu et al in 2020 [14] and has been  
75 used in different countries including India[9], Bangladesh[17], Israel[18], Italy[19], Turkey[20]  
76 and Eastern Europe[21]. The FCV-19S has seven items and five point likert scales ranging from  
77 1 to 5 with lower and higher value indicating strongly disagree and strongly agree respectively.  
78 The total scores ranges between 7 to 35 and the higher the score, the higher the fear of COVID-  
79 19. Similarly, the 14 item Hospital Anxiety and Depression Scale (HADS) was used for  
80 measuring anxiety (HADS-A, 7 item) and depression (HADS-D, 7 item), and 7 item Insomnia  
81 Severity Index (ISI) was used for measuring insomnia.

82 Socio-demographic information of the study participants was collected which included age (up to  
83 40, >40 years), gender (male, female), ethnicity (Brahmin/Chhetri, Janajati and others),  
84 educational qualification (Intermediate and below, bachelor and masters), marital status (single,

85 ever married), family type (nuclear and joint), profession (doctors, nurses, others), living with  
86 children (yes, no), living with older adults (yes, no), presence of chronic disease among family  
87 members (yes, no) and history of medication for mental health problems (yes, no). Similarly,  
88 work related variables included type of health facility (primary, secondary and tertiary), work  
89 experience (up to 5 and >5 years), work role in COVID-19 response (frontline, second line),  
90 adequacy of precautionary measures in work place, (not sufficient, sufficient) aware of  
91 government incentives for health workers (yes, no), perceived stigma (yes, no, do not want to  
92 answer), working in affected district (yes, no) working overtime (yes, no) and change in regular  
93 job duty during COVID-19 (yes, no). Working in affected district was defined as district with at  
94 least one case during the time of data collection.

## 95 **Data analysis**

96 The socio-demographic and job related characteristics, and item wise response of the FCV-19S  
97 were presented in frequency and percentage. Similarly, psychometric properties of the tool were  
98 calculated and presented in S1 Table. The pattern of relationship between FCV-19S and other  
99 psychometric tools (HADS-A, HADS-D and ISI) were explored by using scatter plots and  
100 calculating correlation coefficient (Figure 1 and S2 Table). The COVID-19 fear score was  
101 categorized as presence of fear and absence of fear of COVID-19 based on the median value.  
102 Those having scored more than median (>16) were categorized as presence of fear and less than  
103 or equal to as absence of fear of COVID-19. Chi-square test was done between categorical  
104 independent and categorical dependent variable (S3 Table) and those variables significant at 10%  
105 significance level were fitted in the multivariable logistic regression model. In the regression  
106 model, the effects of gender, ethnicity, profession, education, working in affected district, family  
107 member with chronic disease, faced stigma, precautionary measures in work place, awareness

108 about government incentive and history of medication for mental health problem was  
109 adjusted[22]. One of the independent variables, history of medication for mental health problem  
110 was also fitted into the model though it was not significant in the bivariate analysis as it was  
111 supposed to alter psychological outcomes[23]. The Variance Inflation Factor (VIF) was  
112 measured before conducting multivariable logistic regression analysis which did not detect  
113 multicollinearity (VIF value less than 1.3).

## 114 **Results**

115 Tables 1 show the socio-demographic and job related characteristics of health workers. Among  
116 475 health workers, 52.6% of them were female and 65.9% belonged to Brahmin/Chhetri ethnic  
117 group. The professional category comprised of nurses (35.2%), doctors (33.9%), paramedics  
118 (17.9%) and remaining were other health professionals. Likewise, 25.1% were living with  
119 children, 34.3% were living with elderly, 54.5% had a family member with chronic medical  
120 condition and 4.6% had a history of medication for mental health problems. Majority of the  
121 health workers in this study (82.3%) worked in either secondary or tertiary level health facility.  
122 The proportion of health workers reporting insufficient precautionary measures in the workplace,  
123 facing stigma, aware of government incentives for health workers, change in job duties during  
124 COVID-19 and working overtime was 78.9%, 53.7%, 56.8%, 70.3% and 49.1% respectively.

125 **Table 1: Socio-demographic and job related characteristics of health workers**

| Variables   | Category | N (%)      | Variables                       | Category | N (%)      |
|-------------|----------|------------|---------------------------------|----------|------------|
| Age (years) |          |            | Living with elderly (>60 years) |          |            |
|             | 20-29    | 325 (68.4) |                                 | Yes      | 163 (34.3) |
|             | 30-39    | 124 (26.1) |                                 | No       | 312 (65.7) |
|             | 40-49    | 19 (4.0)   | Family member                   |          |            |

|           |                               |                     |                                                   |                        |            |
|-----------|-------------------------------|---------------------|---------------------------------------------------|------------------------|------------|
|           |                               |                     | with a chronic medical condition                  |                        |            |
|           | 50 and above                  | 7 (1.5)             |                                                   | Yes                    | 259 (54.5) |
|           | Mean age in years ( $\pm$ SD) | 28.20 ( $\pm$ 5.80) |                                                   | No                     | 216 (45.5) |
| Sex       |                               |                     | History of medication for mental health           |                        |            |
|           | Male                          | 225 (47.4)          |                                                   | Yes                    | 22 (4.6)   |
|           | Female                        | 250 (52.6)          |                                                   | No                     | 453 (95.4) |
| Ethnicity |                               |                     | Type of health facility                           |                        |            |
|           | Brahmin/Chhetri               | 313 (65.9)          |                                                   | Primary                | 84 (17.7)  |
|           | Janjati                       | 110 (23.2)          |                                                   | Secondary and tertiary | 391 (82.3) |
|           | Madheshi                      | 52 (6.1)            | Work role                                         |                        |            |
|           | Dalit                         | 7 (1.5)             |                                                   | Front line             | 215 (45.3) |
|           | Others                        | 16 (3.4)            |                                                   | Second line            | 260 (54.7) |
| Education |                               |                     | Work experience (years)                           |                        |            |
|           | Intermediate and below        | 94 (19.8)           |                                                   | Up to 5                | 336 (70.7) |
|           | Bachelors                     | 277 (58.3)          |                                                   | >5                     | 139 (29.3) |
|           | Masters and above             | 104 (21.9)          | Precautionary measures in the workplace           |                        |            |
| Position  |                               |                     |                                                   | Sufficient             | 100 (21.1) |
|           | Nurse                         | 167 (35.2)          |                                                   | Not sufficient         | 375 (78.9) |
|           | Doctor                        | 161 (33.9)          | Experience of stigma due to occupation            |                        |            |
|           | Paramedics                    | 81 (17.1)           |                                                   | Yes                    | 255 (53.7) |
|           | Public health professional    | 32 (6.7)            |                                                   | No                     | 199 (41.9) |
|           | Laboratory staff              | 19 (4.0)            |                                                   | Do not want to answer  | 21 (4.4)   |
|           | Pharmacist                    | 15 (3.2)            | Aware of government incentives for health workers |                        |            |

|                      |              |            |                                              |            |
|----------------------|--------------|------------|----------------------------------------------|------------|
| Marital status       |              |            | Yes                                          | 270 (56.8) |
|                      | Single       | 299 (62.9) | No                                           | 205 (43.2) |
|                      | Ever married | 176 (37.1) | Change in regular job duties during COVID-19 |            |
| Family type          |              |            | Yes                                          | 334 (70.3) |
|                      | Nuclear      | 308 (64.8) | No                                           | 141 (29.7) |
|                      | Joint        | 167 (35.2) | Working overtime during COVID-19             |            |
| Living with children |              |            | Yes                                          | 233 (49.1) |
|                      | Yes          | 119 (25.1) | No                                           | 242 (50.9) |
|                      | No           | 356 (74.9) |                                              |            |

126

127

128 The Table 2 shows the item-wise distribution of responses of FCV-19S respectively. The  
 129 proportion of health workers who either strongly agree or agree to the individual items of FCV-  
 130 19S was highest (32.5%) for ‘When watching news and stories about corona on social media, I  
 131 become nervous and anxious’ and lowest (7.3%) for ‘I cannot sleep because I am worrying about  
 132 getting Corona’.

133

134 **Table 2: Item-wise distribution of responses**

135

| Scale     | Items                                                                                     | Strongly disagree | Disagree   | Neither agree nor disagree | Agree      | Strongly agree |
|-----------|-------------------------------------------------------------------------------------------|-------------------|------------|----------------------------|------------|----------------|
|           |                                                                                           | N (%)             | N (%)      | N (%)                      | N (%)      | N (%)          |
| FCV-19 S1 | I am most afraid of corona virus disease-19                                               | 65 (13.7)         | 150 (31.6) | 132 (27.8)                 | 103 (21.7) | 25 (5.3)       |
| FCV-19 S2 | It makes me uncomfortable to think about corona                                           | 80 (16.8)         | 177 (37.3) | 84 (17.7)                  | 122(25.7)  | 12 (2.5)       |
| FCV-19 S2 | My hands become clammy when I think about corona                                          | 159 (33.5)        | 196 (41.3) | 74 (15.6)                  | 40 (8.4)   | 6 (1.3)        |
| FCV-19 S4 | I am afraid of losing my life because of corona                                           | -                 | 304 (64.0) | 77 (16.2)                  | 80 (16.8)  | 14 (2.9)       |
| FCV-19 S5 | When watching news and stories about corona on social media, I become nervous and anxious | 87 (18.3)         | 150 (31.6) | 84 (17.7)                  | 129 (27.2) | 25 (5.3)       |



|           |                                                                |           |            |           |           |          |
|-----------|----------------------------------------------------------------|-----------|------------|-----------|-----------|----------|
| FCV-19 S6 | I cannot sleep because I am worrying about getting Corona      | -         | 372 (78.3) | 68 (14.3) | 31(6.5)   | 4 (0.8)  |
| FCV-19 S7 | My heart races or palpitates when I think about getting corona | 147(30.9) | 192 (40.4) | 76 (16.0) | 48 (10.1) | 12 (2.5) |

136

137 **Correlation of FCV-19 S with HADS-A, HADS-D and ISI**

138 The correlation analysis showed that FCV-19S was moderately correlated with HADS-A ( $r=$   
 139  $0.513$ ,  $p<0.001$ ) and HADS-D ( $r= 0.425$ ,  $p<0.001$ ) while weakly correlated with ISI ( $r= 0.367$ ,  
 140  $p<0.001$ ). The seven items of the FCV-19S were either weakly or moderately correlated with  
 141 HADS-A, HADS-D and ISI ( $p<0.001$ ) (S2 Table). The scatter plot showing the relationship  
 142 between anxiety and fear, depression and fear, and insomnia and fear adjusted for age and sex is  
 143 shown in Figure 1, Figure 2 and Figure 3 respectively.

144

145 **Fig 1: Scatter plot showing the relationship of fear, with anxiety**

146 **Fig 2: Scatter plot showing the relationship of fear, with depression**

147 **Fig 3: Scatter plot showing the relationship of fear, with insomnia**

148 The colour response is based in age (years) using a colour-gradient: from green, yellow to red for  
 149 lowest to the highest age. The equation in the footnote shows the relationship of fear with  
 150 anxiety, depression and insomnia adjusted for age and sex

151

152 **Predictors of COVID-19 fear among health workers**

153 The bivariate analysis between socio-demographic and job related characteristics is presented in  
 154 S3 Table. The proportion of COVID-19 fear among health workers in this study was 46.1 %  
 155 (219/475). In the adjusted analysis, profession, stigma experience, working in affected district  
 156 and having family member with chronic disease was significantly associated with COVID fear.  
 157 As compared to other health workers, nurses (AOR=2.29; 95% CI: 1.23-4.26) had significantly  
 158 higher odds of having COVID fear. Similarly, health workers working in affected district

159 (AOR=1.76; 95% CI: 1.12-2.77), those having family member with chronic disease (AOR=1.50;  
 160 95% CI: 1.01-2.25), and those who faced stigma (AOR=1.83; 95% CI: 1.12-2.73) had  
 161 significantly higher odds of having COVID fear as compared to those not working in affected  
 162 district, not having a family member with chronic disease, and those not facing stigma  
 163 respectively. Gender, ethnicity, education, precautionary measures, awareness about government  
 164 incentive and history of medication for mental health problems was however not statistically  
 165 significant with COVID fear (Table 3).

166 **Table 3: Factors associated with COVID related fear among health workers (n=475)**

| <b>Variables</b>         | <b>Categories</b>      | <b>Presence of fear<br/>N (%)</b> | <b>Unadjusted OR (95% CI)</b> | <b>Adjusted OR (95% CI)</b> |
|--------------------------|------------------------|-----------------------------------|-------------------------------|-----------------------------|
| <b>Gender</b>            | Male                   | 83 (37.9)                         | Ref                           | Ref                         |
|                          | Female                 | 136 (62.1)                        | 2.04 (1.41-2.95)*             | 1.15 (0.66-1.99)            |
| <b>Ethnicity</b>         | Brahmin/Chhetri        | 129 (58.9)                        | Ref                           | Ref                         |
|                          | Janajati               | 68 (31.1)                         | 2.02 (1.31-3.12)*             | 1.56 (0.97-2.51)            |
|                          | Madheshi               | 11 (5.0)                          | 0.87 (0.40-1.91)              | 1.04 (0.45-2.39)            |
|                          | Others                 | 11 (5.0)                          | 2.62 (0.94-7.25)              | 1.84 (0.61-5.49)            |
| <b>Profession</b>        | Doctor                 | 55 (25.1)                         | 0.78 (0.49-1.24)              | 0.78 (0.46-1.32)            |
|                          | Nurses                 | 106 (48.4)                        | 2.64 (1.67-4.17)*             | 2.29 (1.23-4.26)*           |
|                          | Others                 | 58 (26.5)                         | Ref                           | Ref                         |
| <b>Education</b>         | Intermediate and below | 53 (24.2)                         | Ref                           |                             |
|                          | Bachelor               | 128 (58.4)                        | 0.67 (0.42-1.06)              | 0.83 (0.49-1.41)            |
|                          | Masters and above      | 38 (17.4)                         | 0.45 (0.25-0.79)              | 0.77 (0.39-1.52)            |
| <b>Affected district</b> | Yes                    | 174 (79.5)                        | 1.76 (1.15-                   | 1.76 (1.12-2.77)*           |

|                                           |              |            |                               |                               |
|-------------------------------------------|--------------|------------|-------------------------------|-------------------------------|
|                                           | No           | 45 (20.5)  | 2.68 <sup>†</sup><br>Ref      | Ref                           |
| <b>Family member with chronic disease</b> | Yes          | 132 (60.3) | 1.54 (1.07-2.22) <sup>†</sup> | 1.50 (1.01-2.25) <sup>†</sup> |
|                                           | No           | 87 (39.7)  | Ref                           | Ref                           |
| <b>Precautionary measures</b>             | Sufficient   | 37 (16.9)  | Ref                           | Ref                           |
|                                           | Insufficient | 182 (83.1) | 1.61 (1.02-2.53)              | 1.49 (0.91-2.45)              |
| <b>Faced stigma</b>                       | Yes          | 136 (62.1) | 1.89 (1.31-2.72)              | 1.83 (1.12-2.73) <sup>†</sup> |
|                                           | No           | 83 (37.9)  | Ref                           | Ref                           |
| <b>Aware about government incentive</b>   | Yes          | 112 (51.1) | 0.65 (0.45-0.94) <sup>†</sup> | 0.79 (0.53-1.19)              |
|                                           | No           | 107 (48.9) | Ref                           | Ref                           |
| <b>History of medication</b>              | Yes          | 7 (3.2)    | 0.53 (0.21-1.33)              | 0.60 (0.23-1.58)              |
|                                           | No           | 212 (96.8) | Ref                           | Ref                           |

167

## 168 Discussion

169 This study documents the factors associated with the presence of fear related to COVID-19  
 170 among health workers in Nepal in the early phase of the pandemic. The study identified  
 171 profession, working in the affected region, presence of family member with chronic disease and  
 172 stigma faced by health workers as significant factors contributing to the presence of fear among  
 173 health workers. In this study, nurses were significantly more likely to have COVID fear than  
 174 other health workers. This might be because of their role in providing patient care more closely,  
 175 frequently and for longer hours compared to other health workers. The chance of being infected  
 176 and transmitting infection to others, dealing with the disease that is highly infective and the

177 uniqueness of the cases might have led to increased fear among nurses. Similar findings were  
178 noted in studies conducted in other countries that have reported COVID-19 cases and countries  
179 that have handled epidemics like SARS in the past [24-27]. Effective strategies to reduce fear  
180 with focus on nurses are thus required to avert COVID fear and psychological distress.

181 In our study, more than half of the health workers experienced stigma during COVID-19.  
182 Stigma faced by health workers was also significantly associated with the higher odds of  
183 presence of fear of COVID-19. Already vulnerable due to exposure to possible infections,  
184 emotional exhaustion due to increasing workload, deployment to newer settings like fever clinics  
185 and lack of adequate PPEs, health workers are more likely to face stigma either internalized or  
186 from public which will impair their performance in COVID-19 response[28]. Stigma reduction  
187 strategies should thus be employed for educating the public which need to include proper  
188 messaging through mass media and community engagement activities[29,30]. Equally important  
189 is to identify the underlying causes of stigma experienced by health works during the epidemic.

190 Working in the affected district was significantly associated with the presence of fear among  
191 health workers. This is obvious as health workers working in the affected districts need to  
192 directly deal with COVID-19 patients or those at risk of infection. Health workers in Hubei  
193 province of China[24] during COVID pandemic and health workers directly involved in the care  
194 of patients in Canada[31] during SARS epidemic also faced more psychological distress as  
195 compared to those not involved in the direct care of COVID patients or less affected areas. As  
196 fear among health workers reflects their psychological wellbeing, health workers working in risk  
197 districts should be supported emotionally and due attention is required on their workload, safety  
198 needs and other personal and family concerns.

199 In this study, presence of family member with chronic disease had higher odds of presence of  
200 COVID-19 fear. The fear of transmission to family members and the vulnerability posed by  
201 chronic disease conditions might have resulted in higher degree of fear among health workers.  
202 This finding is similar to the study from China[32] where health workers were concerned with  
203 the infection of their family members. Personal and family support is thus required for health  
204 workers having family member with chronic diseases.

205 Our study findings showed COVID fear was moderately correlated with anxiety and depression  
206 suggesting detrimental effect of COVID fear to psychological well-being. Perhaps, symptoms of  
207 anxiety and depression were a consequence of working in a high fear environment for an  
208 extended period. It is thus necessary to develop an enabling work environment where health  
209 workers feel protected and are motivated to confront COVID-19 and other similar epidemics.  
210 Health facility managers need to monitor the psychological well-being of their staffs and ensure  
211 proper psychological intervention measures are adopted timely and precisely. In this study, only  
212 one out of five health workers mentioned protective measures in their workplace as sufficient.  
213 Similarly, just over a half of health workers were aware of the government incentives entitled to  
214 them during COVID-19. This clearly reflects the need to improve organizational and policy  
215 aspects for boosting the work morale of health workers to reduce fear and psychological distress  
216 among health workers involved in COVID-19 response.

217 Majority of the socio-demographic and job related characteristics including work role,  
218 precautionary measures in the work place, working overtime and awareness regarding incentives  
219 were not significantly associated with the fear of COVID-19. Further follow-up studies might be  
220 required among health workers to understand the effect of socio-demographic and job related  
221 characteristics in psychological outcome such as fear.

222 Our study has some limitations to be noted. This study was conducted during the early phase of  
223 the pandemic in Nepal when less than 300 COVID-19 cases were reported. The status of fear  
224 might have altered thereafter as COVID-19 cases continue to increase in Nepal. Similarly,  
225 participation in this study required internet access and the survey was administered in English  
226 language. This might have left out health workers who did not have internet access and had  
227 difficulty in comprehending English language. Similarly, the results might have been affected by  
228 subjective response. The feeling of uncertainty about the scale and duration of the epidemic, no  
229 known medication or vaccine, widespread media coverage and news about surge of cases and  
230 deaths in various affluent countries with sophisticated health system and lack of adequate testing  
231 facilities might also have accentuated the perceived level of fear among healthcare workers.  
232 Despite limitations, this study employs FCV-19S to measure the status of fear among health  
233 workers and identify those at risk of developing fear. The evidence generated can be useful to  
234 those at decision making level and health facility managers for designing appropriate  
235 interventions to enhance psychological well-being among health workers in this and similar  
236 epidemics in the future.

## 237 **Conclusion**

238 This study showed a considerable proportion of COVID fear among health workers during the  
239 early phase of pandemic in Nepal. Nurses, health workers working in affected district, those  
240 facing stigma and having family member with chronic diseases were significantly more likely to  
241 have COVID fear than other health workers, health workers working in non-affected district,  
242 those with no stigma experience and those not having a family member with chronic disease.  
243 Based on the study findings, it is recommended to focus on strategies to improve work  
244 environment to reduce fear among health workers, conduct stigma reduction activities, and

245 ensure personal and family support for health workers having family member with chronic  
246 diseases.

### 247 **List of abbreviations**

248 AOR: adjusted odds ratio; CI: confidence interval; COVID-19: Corona virus 2019; FCV-19S:  
249 Fear of COVID-19 Scale; HADS: Hospital Anxiety Depression Scale; ISI: Insomnia severity  
250 index; PPE: personal protective equipment; SARS: Severe Acute Respiratory Syndrome

### 251 **Acknowledgements**

252 The authors would like to acknowledge all the health workers involved in the study and the  
253 Policy, Planning and Monitoring Division of Ministry of Health and Population for providing us  
254 a letter of support for the study.

### 255 **Author's contribution**

256 Conceptualization: Pratik Khanal, Navin Devkota, Kiran Paudel

257 Data curation: Navin Devkota, Kiran Paudel

258 Formal analysis: Pratik Khanal, Minakshi Dahal, Shiva Raj Mishra

259 Methodology: Pratik Khanal, Navin Devkota, Kiran Paudel, Devavrat Joshi

260 Supervision: Devavrat Joshi

261 Writing-original draft: Pratik Khanal, Navin Devkota, Minakshi Dahal, Kiran Paudel

262 Writing-review and editing: Shiva Raj Mishra, Devavrat Joshi

### 263 **Supporting Information**

264 S1: Descriptive analysis of the items of the English version FCV-19S (Doc)

265 S2: Correlation of FCV-19 S with HADS-A, HADS-D and ISI (Doc)

266 S3: Fear of COVID-19 and its associated factors (Doc)

## 267 **References**

- 268 1. Tucci Verinica MN, MEadows Jonathan, Shah Suhal, Galwankar C Sagar, Kapur Bobby G (2020) The  
269 Forgotten Plague: Psychiatric Manifesttion of Ebola, Zika & Emerging Infectious Diseases. Journal  
270 of Global Infectious Diseases 9: 151-156.
- 271 2. Torales J, O'Higgins M, Castaldelli-Maia JM, Ventriglio A (2020) The outbreak of COVID-19 coronavirus  
272 and its impact on global mental health. International Journal of Social Psychiatry:  
273 0020764020915212.
- 274 3. Ho CS, Chee C, Ho R (2020) Mental Health Strategies to Combat the Psychological Impact of  
275 Coronavirus Disease 2019 (COVID-19) Beyond Paranoia and Panic. Annals, Academy of Medicine,  
276 Singapore.
- 277 4. S R (2015) Ebola's Mental health Wounds lingers in Africa. Nature 519: 13-14.
- 278 5. (NTI) NTI, (JHU) JHCfHS (2019) Global Health Security Index: Building Collective Action and  
279 Accountability. 324.
- 280 6. Shrestha R, Shrestha S, Khanal P, Bhuvan KC (2020) Nepal's First Case of COVID-19 and public health  
281 response. J Travel Med.
- 282 7. Health Emergency Operation Center (2020) Coronavirus disease (COVID 19) Outbreak updates &  
283 resource materials. Ministry of Health & Population.
- 284 8. Bhattarai S, Dhungana J, Ensor T, Shrestha UB (2020) Assessment of service availability and Infection  
285 prevention measures in hospitals of Nepal during the transition phase of COVID-19 case surge.  
286 medRxiv: 2020.2005.2013.20097675.
- 287 9. Doshi D, Karunakar P, Sukhabogi JR, Prasanna JS, Mahajan SV (2020) Assessing Coronavirus Fear in  
288 Indian Population Using the Fear of COVID-19 Scale. International Journal of Mental Health and  
289 Addiction 2019.
- 290 10. Lai J, Ma S, Wang Y, Cai Z, Hu J, et al. (2020) Factors Associated With Mental Health Outcomes  
291 Among Health Care Workers Exposed to Coronavirus Disease 2019. JAMA network open 3:  
292 e203976.
- 293 11. Kang L, Li Y, Hu S, Chen M, Yang C, et al. (2020) The mental health of medical workers in Wuhan,  
294 China dealing with the 2019 novel coronavirus. The Lancet Psychiatry 7: e14.
- 295 12. Kumar J, Katto 2nd MS, Badaruddin Sahito BA, Siddique AA, Jamil M, et al. Predictive Factors  
296 Associated with Fear Faced by Healthcare Workers during Covid-19 Pandemic: A Questionnaire  
297 Based Study.
- 298 13. Chong MY, Wang WC, Hsieh WC, Lee CY, Chiu NM, et al. (2004) Psychological impact of severe acute  
299 respiratory syndrome on health workers in a tertiary hospital. British Journal of Psychiatry 185:  
300 127-133.
- 301 14. Ahorsu DK, Lin CY, Imani V, Saffari M, Griffiths MD, et al. (2020) The Fear of COVID-19 Scale:  
302 Development and Initial Validation. International Journal of Mental Health and Addiction.
- 303 15. Gupta AK, Mehra A, Niraula A, Kafle K, Deo SP, et al. (2020) Prevalence of anxiety and depression  
304 among the healthcare workers in Nepal during the COVID-19 pandemic. Asian journal of  
305 psychiatry 54: 102260-102260.



- 306 16. Khanal P, Devkota N, Dahal M, Paudel K, Joshi D (2020) Mental health impacts among health workers  
307 during COVID-19 in a low resource setting: a cross-sectional survey from Nepal. *Globalization*  
308 *and health* 16: 1-12.
- 309 17. Sakib N, Bhuiyan AI, Hossain S, Al Mamun F, Hosen I, et al. (2020) Psychometric Validation of the  
310 Bangla Fear of COVID-19 Scale: Confirmatory factor analysis and Rasch analysis. *International*  
311 *Journal of Mental Health and Addiction*.
- 312 18. Bitan DT, Grossman-Giron A, Bloch Y, Mayer Y, Shiffman N, et al. (2020) Fear of COVID-19 scale:  
313 Psychometric characteristics, reliability and validity in the Israeli population. *Psychiatry*  
314 *Research*: 113100.
- 315 19. Soraci P, Ferrari A, Abbiati FA, Del Fante E, De Pace R, et al. (2020) Validation and psychometric  
316 evaluation of the Italian version of the Fear of COVID-19 Scale. *International Journal of Mental*  
317 *Health and Addiction*: 1-10.
- 318 20. Satici B, Gocet-Tekin E, Deniz ME, Satici SA (2020) Adaptation of the Fear of COVID-19 Scale: Its  
319 association with psychological distress and life satisfaction in Turkey. *International Journal of*  
320 *Mental Health and Addiction* 8: 1-9.
- 321 21. Reznik A, Gritsenko V, Konstantinov V, Khamenka N, Isralowitz R (2020) COVID-19 Fear in Eastern  
322 Europe: Validation of the Fear of COVID-19 Scale. *International Journal of Mental Health and*  
323 *Addiction*: 1.
- 324 22. Bursac Z Gauss CH Williams DK, & Hosmer DW (2008). Purposeful selection of variables in logistic  
325 regression *Source Code for Biology and Medicine* 3: 17.
- 326 23. Zhu Z, Xu S, Wang H, Liu Z, Wu J, et al. (2020) COVID-19 in Wuhan: Immediate Psychological Impact  
327 on 5062 Health Workers. *medRxiv*.
- 328 24. Lai J, Ma S, Wang Y, Cai Z, Hu J, et al. (2020) Factors associated with mental health outcomes among  
329 health care workers exposed to coronavirus disease 2019. *JAMA network open* 3: e203976-  
330 e203976.
- 331 25. Maunder RG, Lancee WJ, Rourke S, Hunter JJ, Goldbloom D, et al. (2004) Factors associated with the  
332 psychological impact of severe acute respiratory syndrome on nurses and other hospital  
333 workers in Toronto. *Psychosom Med* 66: 938-942.
- 334 26. Maben J, Bridges J (2020) Covid-19: Supporting nurses' psychological and mental health. *Journal of*  
335 *clinical nursing*.
- 336 27. Shanafelt T, Ripp J, Trockel M (2020) Understanding and addressing sources of anxiety among health  
337 care professionals during the COVID-19 pandemic. *Jama* 323: 2133-2134.
- 338 28. Ramaci T, Barattucci M, Ledda C, Rapisarda V (2020) Social Stigma during COVID-19 and its Impact on  
339 HCWs Outcomes. *Sustainability* 12: 3834.
- 340 29. Bruns DP, Kraguljac NV, Bruns TR (2020) COVID-19: Facts, Cultural Considerations, and Risk of  
341 Stigmatization. *Journal of Transcultural Nursing* 31: 326-332.
- 342 30. Logie CH, Turan JM (2020) How do we balance tensions between COVID-19 public health responses  
343 and stigma mitigation? *Learning from HIV research. AIDS and Behavior*: 1-4.
- 344 31. Nickell LA, Crighton EJ, Tracy CS, Al-Enazy H, Bolaji Y, et al. (2004) Psychosocial effects of SARS on  
345 hospital staff: survey of a large tertiary care institution. *Cmaj* 170: 793-798.
- 346 32. Dai Y, Hu G, Xiong H, Qiu H, Yuan X (2020) Psychological impact of the coronavirus disease 2019  
347 (COVID-19) outbreak on healthcare workers in China. *medRxiv*.

348

NOBS = 475

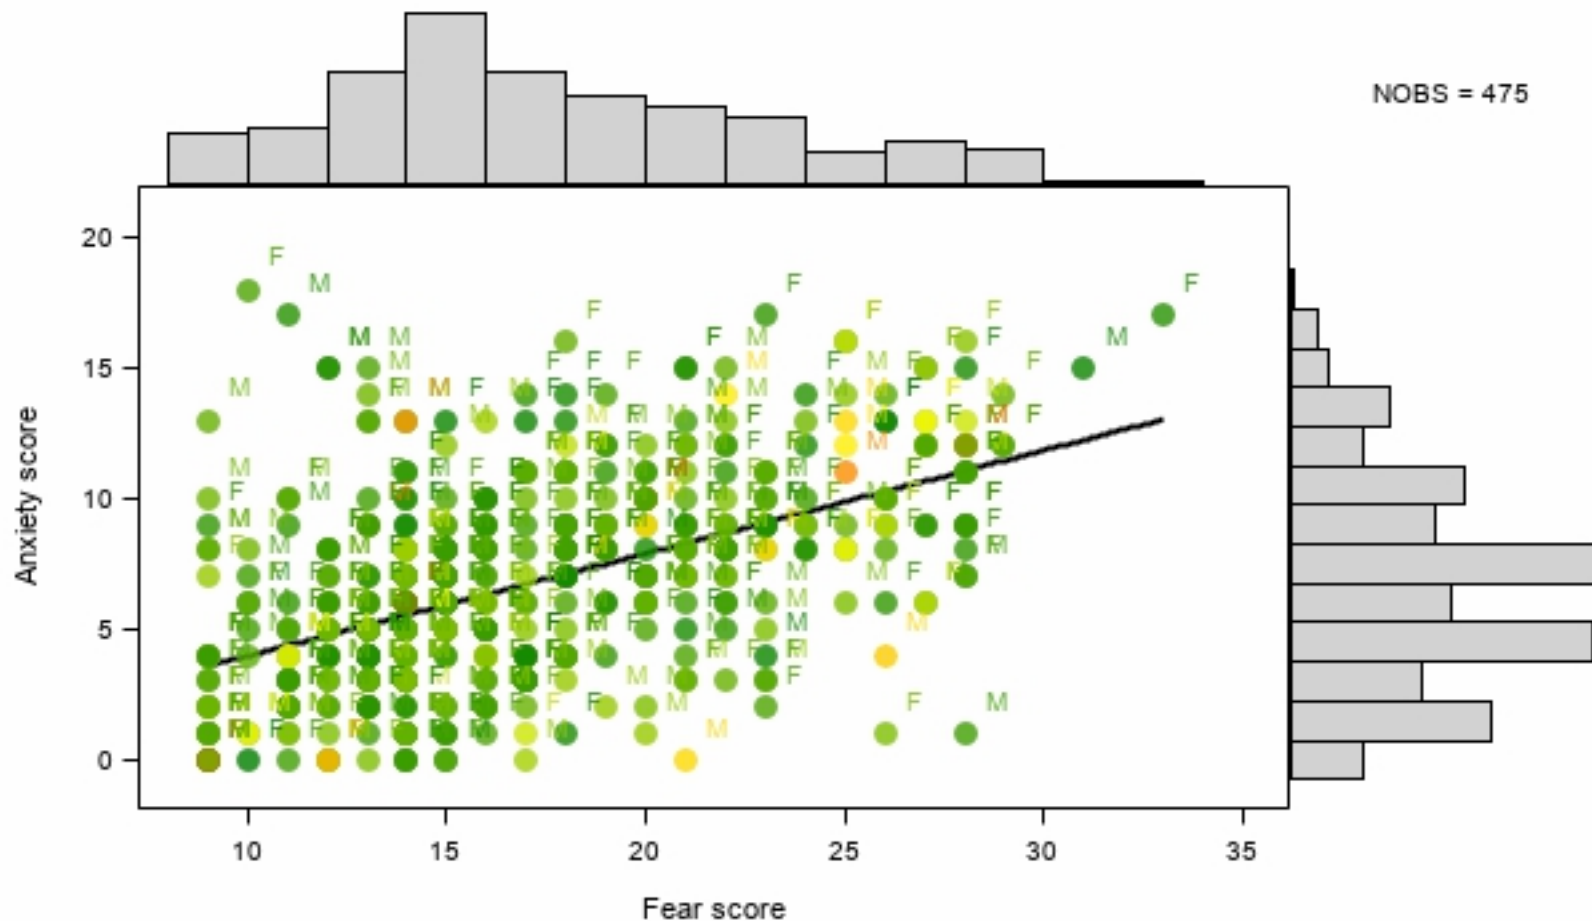

Equation:  $Anxiety = 0.38 + 0.39 * Fear - 0.03 * Age + 0.37 * Sex$ ,  $R^2 = 0.27$

Figure 1

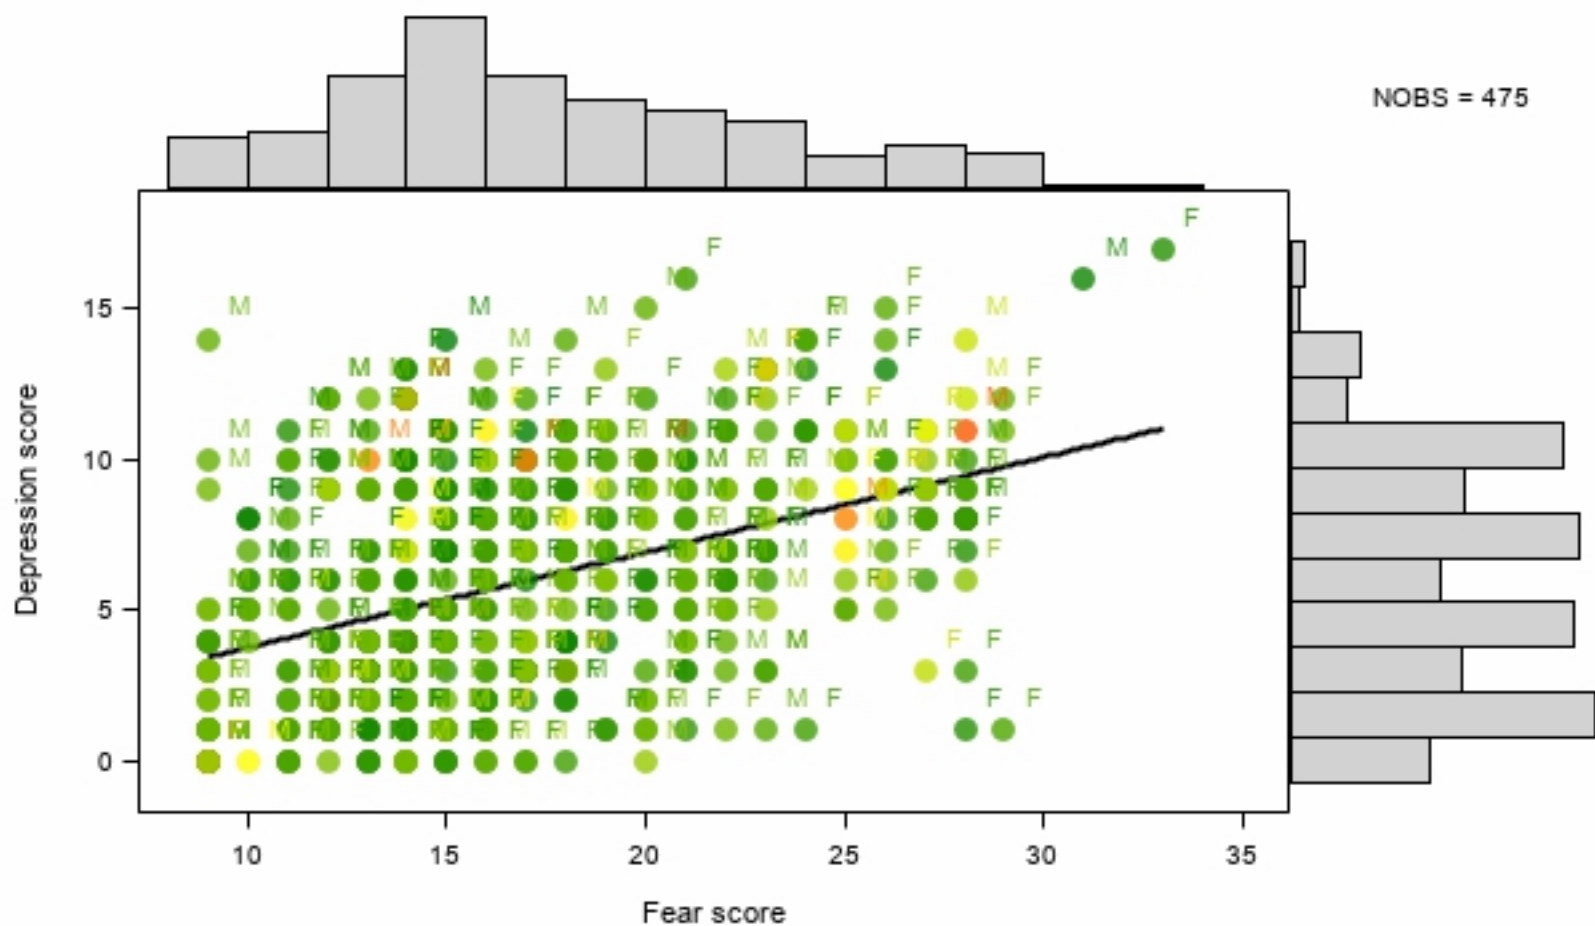

Figure 2

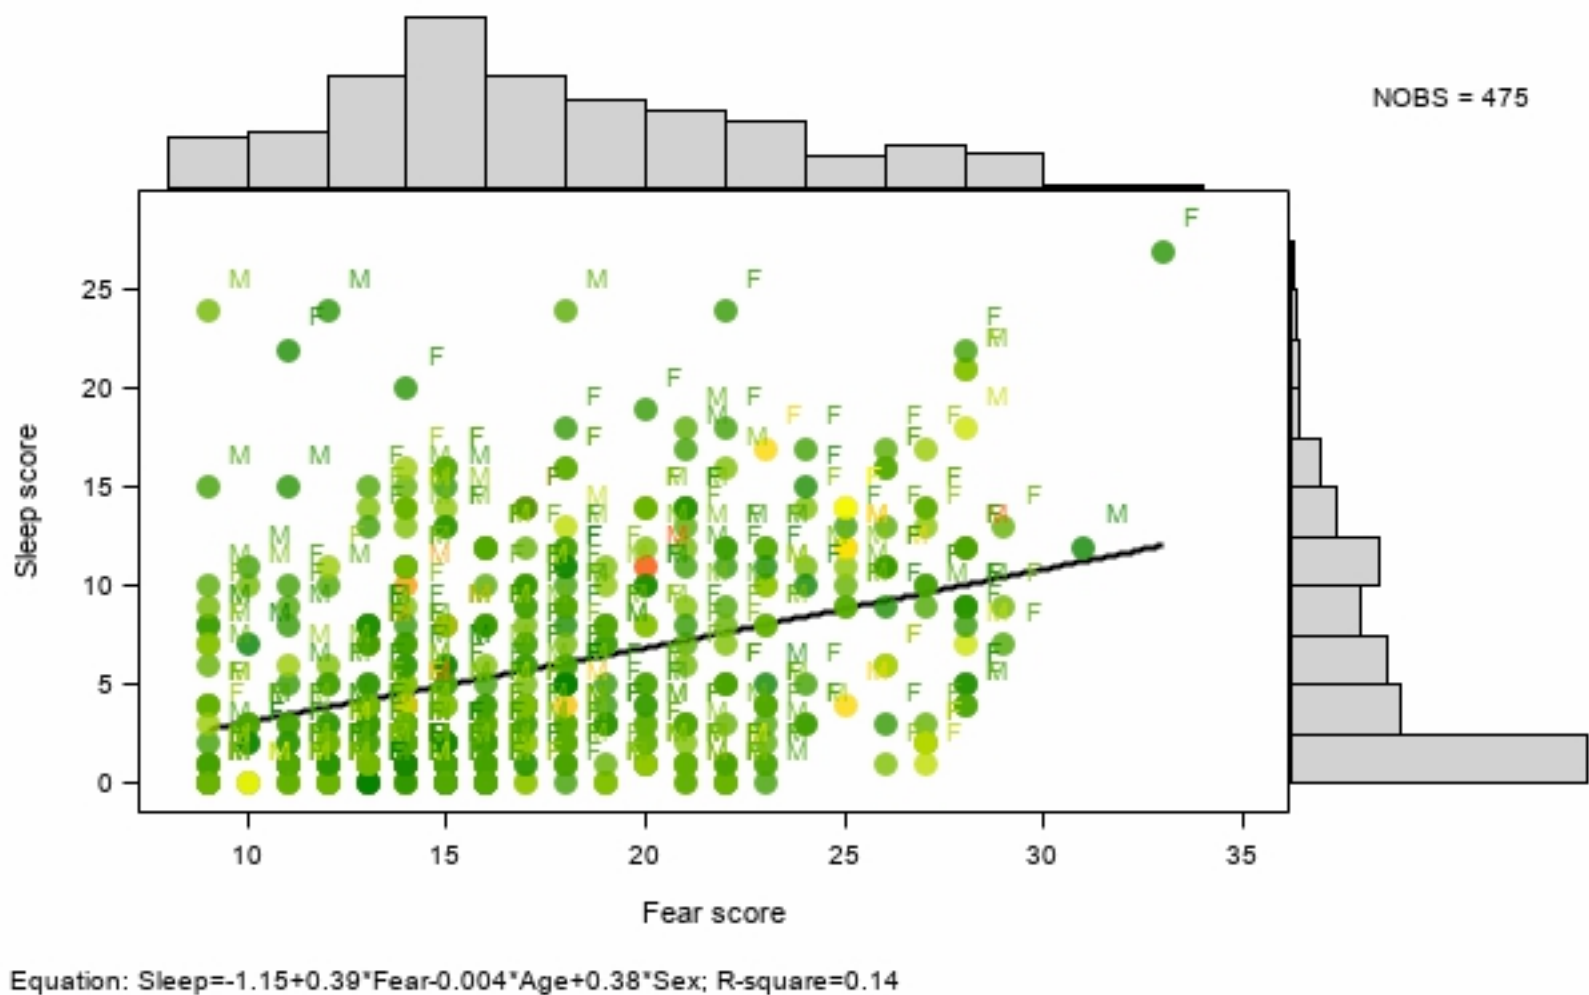

Figure 3
